# Supplementary material for: Oral Processing of Three Guenon Species in Taï National Park, Côte d’Ivoire
Source: MDPI journal article supplement (doi:10.3390/biology11121850), 2022-12-19
Supplement: s1 [file s1]

# Supplementary Materials

| Species                        | <i>C. campbelli</i> |           |                   |                   |                    | <i>C. diana</i> |           |      |      |       | <i>C. petaurista</i> |           |      |      |       |
|--------------------------------|---------------------|-----------|-------------------|-------------------|--------------------|-----------------|-----------|------|------|-------|----------------------|-----------|------|------|-------|
|                                | Focals (N)          | Action(N) | I <sup>1</sup> /A | C <sup>2</sup> /A | PC <sup>3</sup> /A | Focals (N)      | Action(N) | I/A  | C/A  | PC/A  | Focals (N)           | Action(N) | I/A  | C/A  | PC/A  |
| <b>Fruit</b>                   | 223                 | 2574      | 0.86              | 0.01              | 10.15              | 582             | 11657     | 2.07 | 0.00 | 19.48 | 73                   | 1156      | 0.88 | 0.05 | 9.91  |
| <i>Annikia polycarpa</i>       |                     |           |                   |                   |                    | 1               | 3         | 0.00 | 0.00 | 18.00 |                      |           |      |      |       |
| <i>Aninguera robusta</i>       |                     |           |                   |                   |                    | 2               | 28        | 1.55 | 0.00 | 6.82  |                      |           |      |      |       |
| <i>Ans. mam</i>                | 1                   | 6         | 1.00              | 0.00              | 18.83              |                 |           |      |      |       |                      |           |      |      |       |
| <i>Calpocalyps brevibactus</i> |                     |           |                   |                   |                    | 2               | 14        | 2.50 | 0.00 | 16.53 |                      |           |      |      |       |
| <i>Cersalia afzeli</i>         | 4                   | 13        | 0.88              | 0.00              | 10.43              | 1               | 8         | 1.63 | 0.00 | 26.38 |                      |           |      |      |       |
| <i>Cissus sp.</i>              | 1                   | 14        | 0.00              | 0.00              | 7.29               |                 |           |      |      |       |                      |           |      |      |       |
| <i>Coelycarion oxycarpum</i>   | 1                   | 12        | 1.00              | 0.00              | 5.50               | 1               | 10        | 1.10 | 0.00 | 4.30  |                      |           |      |      |       |
| <i>Culcasia grandiflora</i>    | 1                   | 21        | 1.00              | 0.00              | 2.80               |                 |           |      |      |       | 2                    | 11        | 1.00 | 0.00 | 25.13 |
| <i>Dacryodes klaineana</i>     |                     |           |                   |                   |                    | 17              | 428       | 1.25 | 0.00 | 3.78  |                      |           |      |      |       |
| <i>Dialium aubrevillei</i>     | 15                  | 156       | 0.91              | 0.00              | 6.96               | 27              | 789       | 1.30 | 0.00 | 8.90  | 7                    | 92        | 0.85 | 0.00 | 7.21  |
| <i>Dialium dinklagei</i>       | 1                   | 3         | 1.00              | 0.00              | 17.00              |                 |           |      |      |       |                      |           |      |      |       |
| <i>Diospyros manni</i>         | 25                  | 241       | 0.95              | 0.02              | 7.05               | 148             | 2547      | 1.92 | 0.00 | 37.74 | 7                    | 78        | 0.85 | 0.15 | 11.32 |
| <i>Diospyros sanza-minika</i>  | 3                   | 33        | 1.00              | 0.00              | 5.75               | 22              | 305       | 1.90 | 0.00 | 21.14 |                      |           |      |      |       |
| <i>Diospyros soubreana</i>     | 8                   | 61        | 0.95              | 0.03              | 9.42               | 61              | 936       | 4.58 | 0.00 | 16.24 | 4                    | 33        | 1.00 | 0.00 | 10.37 |
| <i>Heritiera utilis</i>        | 3                   | 19        | 0.93              | 0.00              | 5.52               |                 |           |      |      |       |                      |           |      |      |       |
| <i>Klainodoxa gabonensis</i>   | 4                   | 54        | 0.8               | 0.16              | 7.41               | 19              | 532       | 1.48 | 0.00 | 5.64  |                      |           |      |      |       |
| <i>Landolphia welwitschii</i>  |                     |           |                   |                   |                    | 1               | 13        | 1.23 | 0.00 | 11.54 |                      |           |      |      |       |
| <i>Maesobotria bateri</i>      | 3                   | 26        | 0.00              | 0.00              | 7.32               | 13              | 602       | 0.83 | 0.00 | 5.17  |                      |           |      |      |       |
| <i>Memecylon lateriflorum</i>  | 13                  | 112       | 0.85              | 0.00              | 25.54              |                 |           |      |      |       |                      |           |      |      |       |
| <i>Musanga cercopioides</i>    | 1                   | 2         | 0.00              | 0.00              | 17.67              | 2               | 13        | 3.69 | 0.00 | 18.76 | 1                    | 7         | 0.86 | 0.00 | 10.71 |
| <i>Napoleona leonensis</i>     | 2                   | 9         | 1.00              | 0.00              | 21.93              | 2               | 30        | 1.33 | 0.00 | 8.29  |                      |           |      |      |       |
| <i>Naulea pobeguini</i>        | 1                   | 5         | 1.00              | 0.00              | 29.20              |                 |           |      |      |       |                      |           |      |      |       |
| <i>Octonema borealis</i>       |                     |           |                   |                   |                    | 2               | 15        | 1.33 | 0.00 | 3.04  |                      |           |      |      |       |
| <i>Parinari aubrevillei</i>    | 1                   | 16        | 1.41              | 0.00              | 3.71               |                 |           |      |      |       |                      |           |      |      |       |
| <i>Parinari excelsa</i>        | 9                   | 184       | 0.88              | 0.00              | 9.28               | 25              | 536       | 2.77 | 0.00 | 10.93 | 14                   | 348       | 0.92 | 0.08 | 8.64  |
| <i>Parkia bicolor</i>          |                     |           |                   |                   |                    | 5               | 76        | 2.29 | 0.00 | 8.12  |                      |           |      |      |       |
| <i>Pauridiantha sylvicola</i>  |                     |           |                   |                   |                    | 1               | 7         | 1.00 | 0.00 | 1.71  |                      |           |      |      |       |

|                                |    |     |      |      |       |     |      |      |      |       |     |      |      |      |       |
|--------------------------------|----|-----|------|------|-------|-----|------|------|------|-------|-----|------|------|------|-------|
| <i>Pentadesma butacyrea</i>    |    |     |      |      |       | 1   | 19   | 1.26 | 0.00 | 3.32  |     |      |      |      |       |
| <i>Pycnanthus angolensis</i>   |    |     |      |      |       | 3   | 35   | 1.52 | 0.00 | 11.75 |     |      |      |      |       |
| <i>Rothmannia whitjieldii</i>  | 13 | 181 | 0.97 | 0.04 | 10.43 |     |      |      |      |       | 6   | 138  | 0.66 | 0.25 | 9.33  |
| <i>Sacoglottis gabonensis</i>  | 59 | 781 | 0.96 | 0.00 | 9.73  | 117 | 2057 | 2.98 | 0.00 | 17.36 | 15  | 338  | 0.70 | 0.00 | 17.65 |
| <i>Salacia leteritia</i>       |    |     |      |      |       | 3   | 63   | 1.42 | 0.00 | 12.70 |     |      |      |      |       |
| <i>Scytopetalum tieghemii</i>  |    |     |      |      |       | 74  | 1421 | 0.18 | 0.00 | 13.01 |     |      |      |      |       |
| <i>Spondianthus preussi</i>    |    |     |      |      |       |     |      |      |      |       | 1   | 12   | 0.58 | 0.00 | 0.67  |
| <i>Spyropetalum sp.</i>        |    |     |      |      |       | 4   | 187  | 1.05 | 0.00 | 3.78  |     |      |      |      |       |
| <i>Sterculia tragacantha</i>   | 2  | 13  | 1.00 | 0.00 | 12.55 |     |      |      |      |       |     |      |      |      |       |
| <i>Tetracera potatoria</i>     |    |     |      |      |       |     |      |      |      |       | 2   | 40   | 0.56 | 0.00 | 11.94 |
| <i>Trichosypha arborea</i>     |    |     |      |      |       | 3   | 107  | 1.12 | 0.00 | 5.13  |     |      |      |      |       |
| <i>Trichosypha beguei</i>      | 8  | 89  | 0.80 | 0.00 | 9.62  |     |      |      |      |       |     |      |      |      |       |
| <i>Uapaca esculenta</i>        | 2  | 37  | 0.91 | 0.09 | 11.72 | 11  | 360  | 1.36 | 0.00 | 10.31 |     |      |      |      |       |
| <i>Uapaca guinensis</i>        | 14 | 188 | 0.93 | 0.00 | 13.80 |     |      |      |      |       |     |      |      |      |       |
| <i>Xylopia parviflora</i>      | 1  | 6   | 1.00 | 0.00 | 6.50  |     |      |      |      |       |     |      |      |      |       |
| <i>Xylopia taiensis</i>        | 2  | 28  | 1.00 | 0.00 | 7.31  | 2   | 30   | 1.53 | 0.00 | 15.02 |     |      |      |      |       |
| <b>Unripe fruit</b>            |    |     |      |      |       |     |      |      |      |       |     |      |      |      |       |
| <i>Culcasia grandiflora</i>    | 1  | 9   | 1.00 | 0.00 | 4.56  |     |      |      |      |       |     |      |      |      |       |
| <i>Diospyros manni</i>         | 1  | 8   | 1.00 | 0.00 | 5.88  |     |      |      |      |       |     |      |      |      |       |
| <i>Diospyros soubreana</i>     | 4  | 63  | 0.75 | 0.00 | 8.31  |     |      |      |      |       |     |      |      |      |       |
| <i>Heritiera utilis</i>        | 1  | 5   | 1.00 | 0.00 | 16.00 |     |      |      |      |       |     |      |      |      |       |
| <i>Hypselodelphys violacea</i> |    |     |      |      |       |     |      |      |      |       | 1   | 10   | 0.90 | 0.00 | 13.50 |
| <i>Maesobotria bateri</i>      | 11 | 129 | 0.45 | 0.00 | 7.42  |     |      |      |      |       |     |      |      |      |       |
| <i>Memecylon lateriflorum</i>  |    |     |      |      |       |     |      |      |      |       | 3   | 43   | 1.00 | 0.00 | 16.52 |
| <i>Napoleona leonensis</i>     | 4  | 29  | 0.75 | 0.00 | 6.21  |     |      |      |      |       |     |      |      |      |       |
| <i>Sterculia tragacantha</i>   | 3  | 21  | 1.00 | 0.00 | 11.50 |     |      |      |      |       |     |      |      |      |       |
| <i>Warneckea membranifoli</i>  |    |     |      |      |       |     |      |      |      |       | 1   | 6    | 1.00 | 0.00 | 16.50 |
| <b>Young leaves</b>            | 17 | 71  | 0.73 | 0.00 | 14.69 | 235 | 2809 | 3.09 | 0.00 | 15.73 | 142 | 1136 | 0.56 | 0.00 | 17.24 |
| <i>Calpocalyx brevibactus</i>  |    |     |      |      |       |     |      |      |      |       | 1   | 6    | 0.00 | 0.00 | 13.67 |
| <i>Cepheoli yapoinsis</i>      |    |     |      |      |       | 2   | 28   | 2.01 | 0.00 | 16.63 |     |      |      |      |       |
| <i>Cersalia afzeli</i>         |    |     |      |      |       | 23  | 174  | 4.19 | 0.00 | 21.76 |     |      |      |      |       |
| <i>Combretum aphanoptealum</i> |    |     |      |      |       |     |      |      |      |       | 10  | 58   | 0.33 | 0.00 | 23.39 |

|                                       |     |     |      |      |       |      |      |      |      |       |    |     |      |      |       |
|---------------------------------------|-----|-----|------|------|-------|------|------|------|------|-------|----|-----|------|------|-------|
| <i>Craterispermum caudatum</i>        | 1   | 6   | 1.00 | 0.00 | 13.60 | 60   | 774  | 2.64 | 0.00 | 14.96 | 13 | 75  | 0.69 | 0.00 | 18.42 |
| <i>Culcasia grandiflora</i>           | 5   | 18  | 0.86 | 0.00 | 16.53 | 16   | 143  | 4.84 | 0.00 | 23.69 | 16 | 87  | 0.77 | 0.00 | 26.53 |
| <i>Dalbergia cyclocarpa</i>           |     |     |      |      |       |      |      |      |      |       | 8  | 63  | 0.36 | 0.00 | 15.73 |
| <i>Dialium aubrevillei</i>            | 2   | 7   | 0.54 | 0.00 | 11.63 |      |      |      |      |       | 2  | 15  | 0.72 | 0.00 | 12.97 |
| <i>Griffonia simplicifolia</i>        |     |     |      |      |       |      |      |      |      |       | 36 | 311 | 0.67 | 0.00 | 15.77 |
| <i>Maesobotria bateri</i>             | 4   | 15  | 0.79 | 0.00 | 18.33 | 48   | 575  | 2.76 | 0.00 | 14.69 | 4  | 35  | 0.51 | 0.00 | 16.49 |
| <i>Memecylon lateriflorum</i>         |     |     |      |      |       |      |      |      |      |       | 2  | 21  | 0.75 | 0.00 | 20.05 |
| <i>Pauridiantha sylvicola</i>         |     |     |      |      |       | 1    | 1    | 4.00 | 0.00 | 57.00 | 1  | 7   | 0.29 | 0.00 | 11.00 |
| <i>Rhigiocarya racemifera</i>         |     |     |      |      |       |      |      |      |      |       | 1  | 12  | 1.00 | 0.00 | 13.25 |
| <i>Strychnos aculeata</i>             |     |     |      |      |       |      |      |      |      |       | 4  | 53  | 0.61 | 0.00 | 20.68 |
| <i>Vitex micrantha</i>                |     |     |      |      |       |      |      |      |      |       | 50 | 428 | 0.82 | 0.00 | 23.17 |
| <b>Mature leaves</b>                  | 4   | 25  | 0.29 | 0.00 | 20.56 | 350  | 4157 | 2.49 | 0.00 | 24.15 |    |     |      |      |       |
| <i>Cepheoli yapoinsis</i>             |     |     |      |      |       | 1    | 24   | 1.08 | 0.00 | 10.46 |    |     |      |      |       |
| <i>Craterispermum caudatum</i>        | 1   | 5   | 0.00 | 0.00 | 18.00 | 74   | 848  | 2.57 | 0.00 | 23.86 | 5  | 28  | 0.60 | 0.00 | 38.40 |
| <i>Culcasia grandiflora</i>           |     |     |      |      |       |      |      |      |      |       | 2  | 14  | 1.00 | 0.00 | 24.98 |
| <i>Dalbergia cyclocarpa</i>           |     |     |      |      |       |      |      |      |      |       | 1  | 4   | 0.75 | 0.00 | 26.75 |
| <i>Maesobotria bateri</i>             | 2   | 10  | 0.38 | 0.00 | 24.06 | 30   | 440  | 2.11 | 0.00 | 22.12 | 22 | 230 | 0.78 | 0.00 | 18.31 |
| <i>Napoleona leonensis</i>            |     |     |      |      |       | 1    | 10   | 1.00 | 0.00 | 21.20 |    |     |      |      |       |
| <i>Pauridiantha sylvicola</i>         |     |     |      |      |       |      |      |      |      |       | 3  | 29  | 0.97 | 0.00 | 27.43 |
| <i>Polyathia olivieri</i>             |     |     |      |      |       |      |      |      |      |       | 8  | 48  | 0.98 | 0.00 | 28.16 |
| <i>Vitex grandifolia</i>              |     |     |      |      |       |      |      |      |      |       | 1  | 11  | 0.55 | 0.00 | 21.43 |
| <i>Vitex micrantha</i>                |     |     |      |      |       |      |      |      |      |       | 1  | 4   | 0.75 | 0.00 | 12.75 |
| <b>Invertebrates</b>                  | 104 | 306 | 0.58 | 0.04 | 13.22 | 1164 | 9459 | 1.14 | 0.00 | 9.24  | 24 | 36  | 0.60 | 0.00 | 15.81 |
| <b>Other material</b>                 |     |     |      |      |       |      |      |      |      |       |    |     |      |      |       |
| <i>Craterispermum caudatum</i> flower |     |     |      |      |       | 1    | 159  | 1.06 | 0.00 | 1.45  | 1  | 17  | 0.06 | 0.00 | 4.53  |
| <i>Polyathia olivieri</i> flower      |     |     |      |      |       |      |      |      |      |       | 2  | 26  | 0.00 | 0.00 | 19.02 |
| <i>Popovia</i> flower                 | 1   | 2   | 1.00 | 0.00 | 11.00 |      |      |      |      |       |    |     |      |      |       |
| <i>Rothmannia whitfieldii</i> flower  |     |     |      |      |       |      |      |      |      |       | 4  | 20  | 1.00 | 0.00 | 19.80 |
| Frog eggs                             |     |     |      |      |       | 8    | 125  | 1.86 | 0.00 | 3.36  |    |     |      |      |       |
| Mushroom                              | 1   | 1   | 0.00 | 0.00 | 28.00 | 8    | 160  | 1.17 | 0.00 | 11.44 | 3  | 20  | 0.35 | 0    | 19.53 |
| Sap                                   |     |     |      |      |       | 3    | 15   | 2.04 | 0.00 | 17.60 |    |     |      |      |       |
| <i>Diospyros manni</i> seed           | 9   | 42  | 7.15 | 0.00 | 24.27 |      |      |      |      |       | 2  | 3   | 5.00 | 0.00 | 73.25 |

|                                    |   |    |      |      |       |   |    |      |      |      |    |      |      |       |       |
|------------------------------------|---|----|------|------|-------|---|----|------|------|------|----|------|------|-------|-------|
| <i>Diospyros soubreana</i> seed    | 2 | 16 | 0.50 | 0.00 | 6.76  |   |    |      |      |      |    |      |      |       |       |
| <i>Strephonyma pseudocola</i> seed | 3 | 11 | 0.47 | 0.00 | 7.61  |   |    |      |      | 1    | 5  | 0.00 | 0.00 | 22.00 |       |
| <i>Dalbergia cyclocarpa</i> stem   | 1 | 3  | 0.67 | 0.00 | 24.00 |   |    |      |      |      |    |      |      |       |       |
| <i>Diospyros canaliculata</i> stem |   |    |      |      |       |   |    |      |      | 4    | 60 | 0.98 | 0.00 | 7.12  |       |
| <i>Heritiera utilis</i> stem       | 1 | 11 | 1.00 | 0.00 | 16.82 |   |    |      |      |      |    |      |      |       |       |
| <i>Palisota hirsuta</i> stem       | 5 | 82 | 0.99 | 0.00 | 10.82 |   |    |      |      |      |    |      |      |       |       |
| <i>Polyathia olivieri</i> stem     |   |    |      |      |       |   |    |      |      | 2    | 35 | 0.74 | 0.26 | 8.92  |       |
| <i>Sacoglottis gabonensis</i> stem |   |    |      |      |       |   |    |      |      | 1    | 2  | 1.00 | 0.00 | 3.50  |       |
| <i>Trichosypha arborea</i> stem    |   |    |      |      |       | 5 | 80 | 1.51 | 0.00 | 7.39 | 1  | 6    | 1.00 | 0.00  | 12.33 |
| Termite mound                      | 1 | 1  | 5.00 | 0.00 | 37.00 |   |    |      |      |      |    |      |      |       |       |

Supplementary Table S1. We report the number of focals by food type and by species, the number of ingestive actions, and mean incisor use, canine use, and post-canine chews per ingestive action for all identified food items eaten by each guenon species. Total values and means for broad food categories include unidentified plant species (e.g., unknown fruit, young leaves of unknown liana) as well as identified food items.

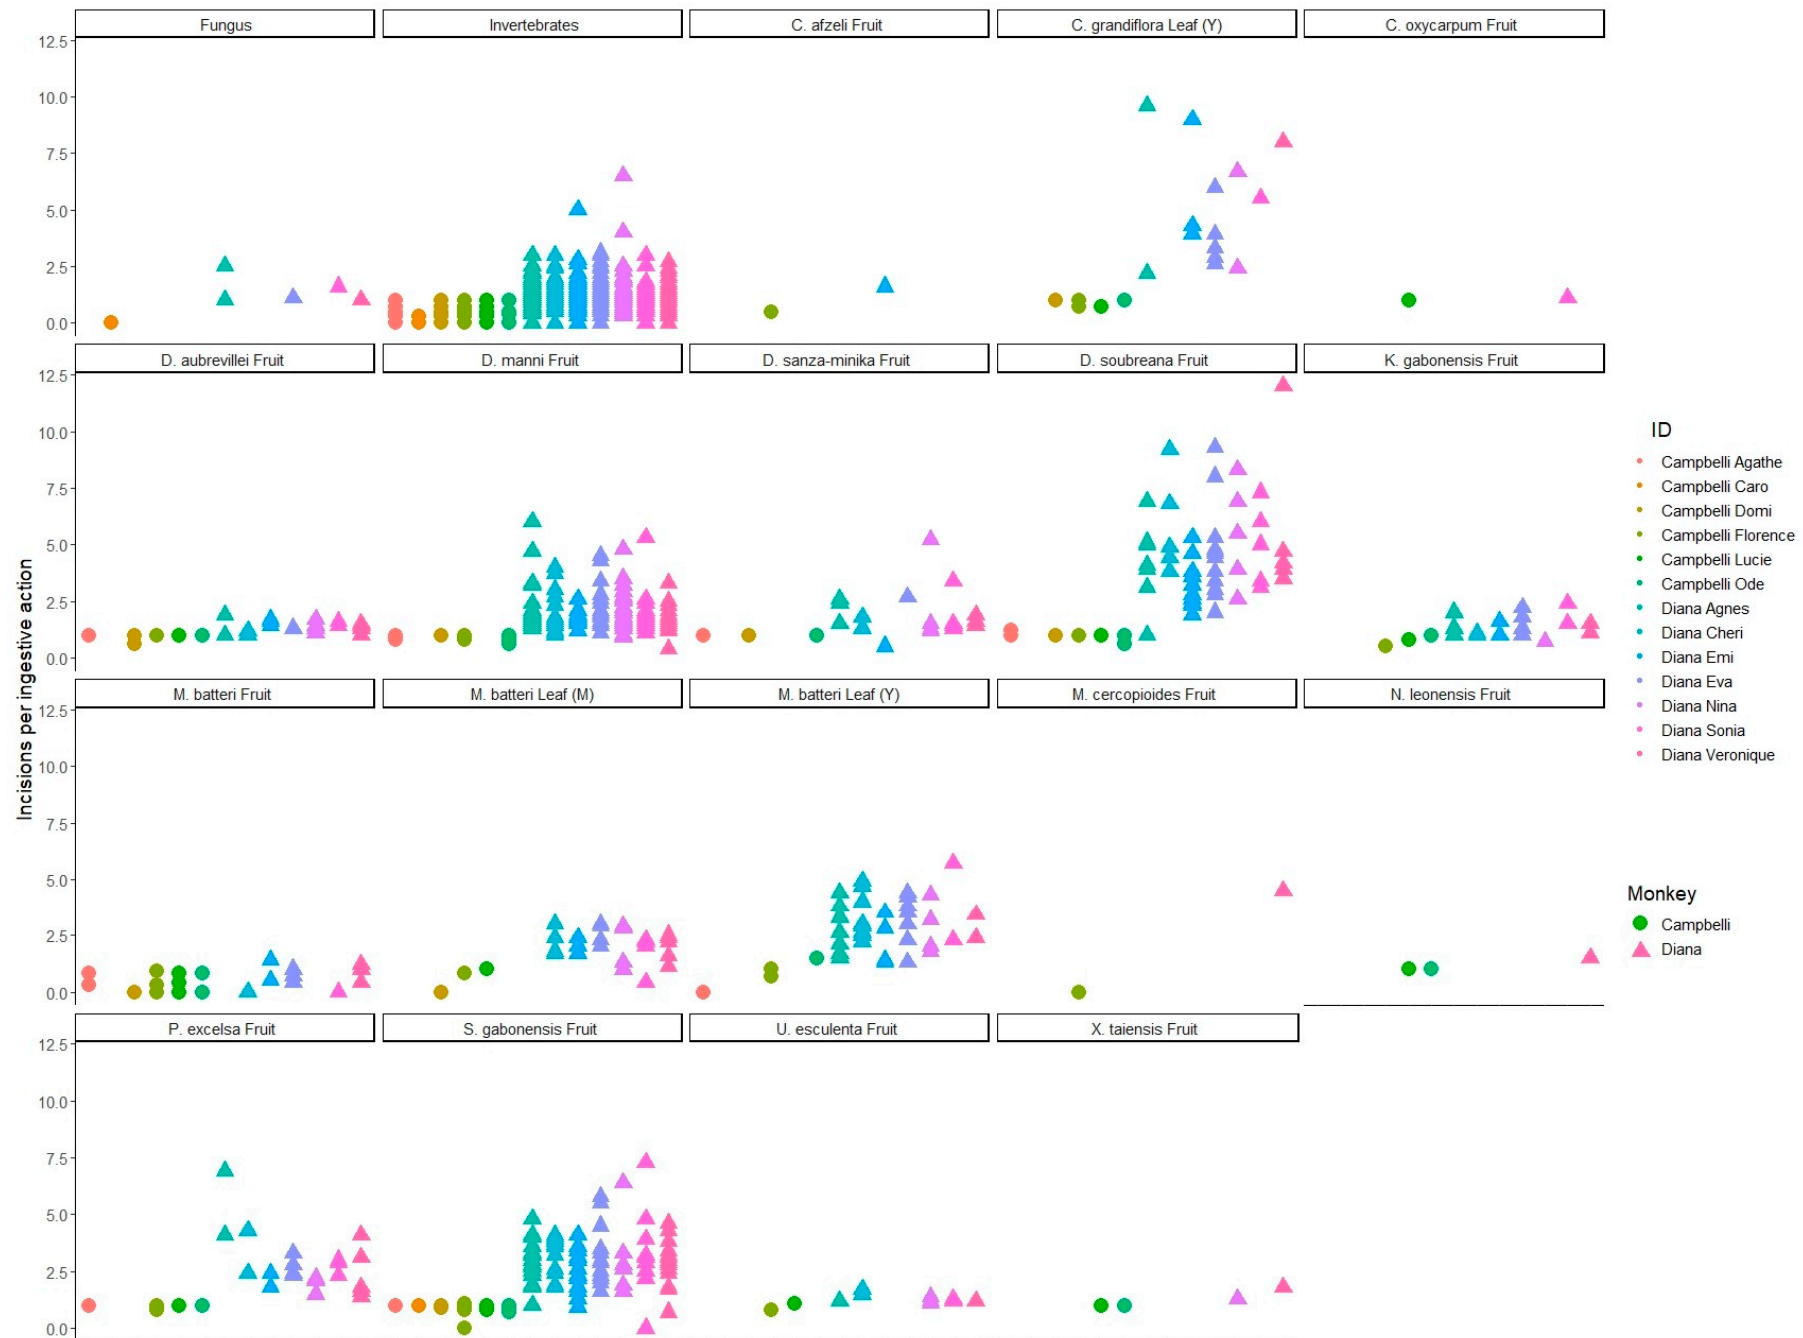

Supplemental Figure S1. Incisions per ingestive action during focal follows of individually identified Campbell's and Diana monkeys feeding on shared food items.

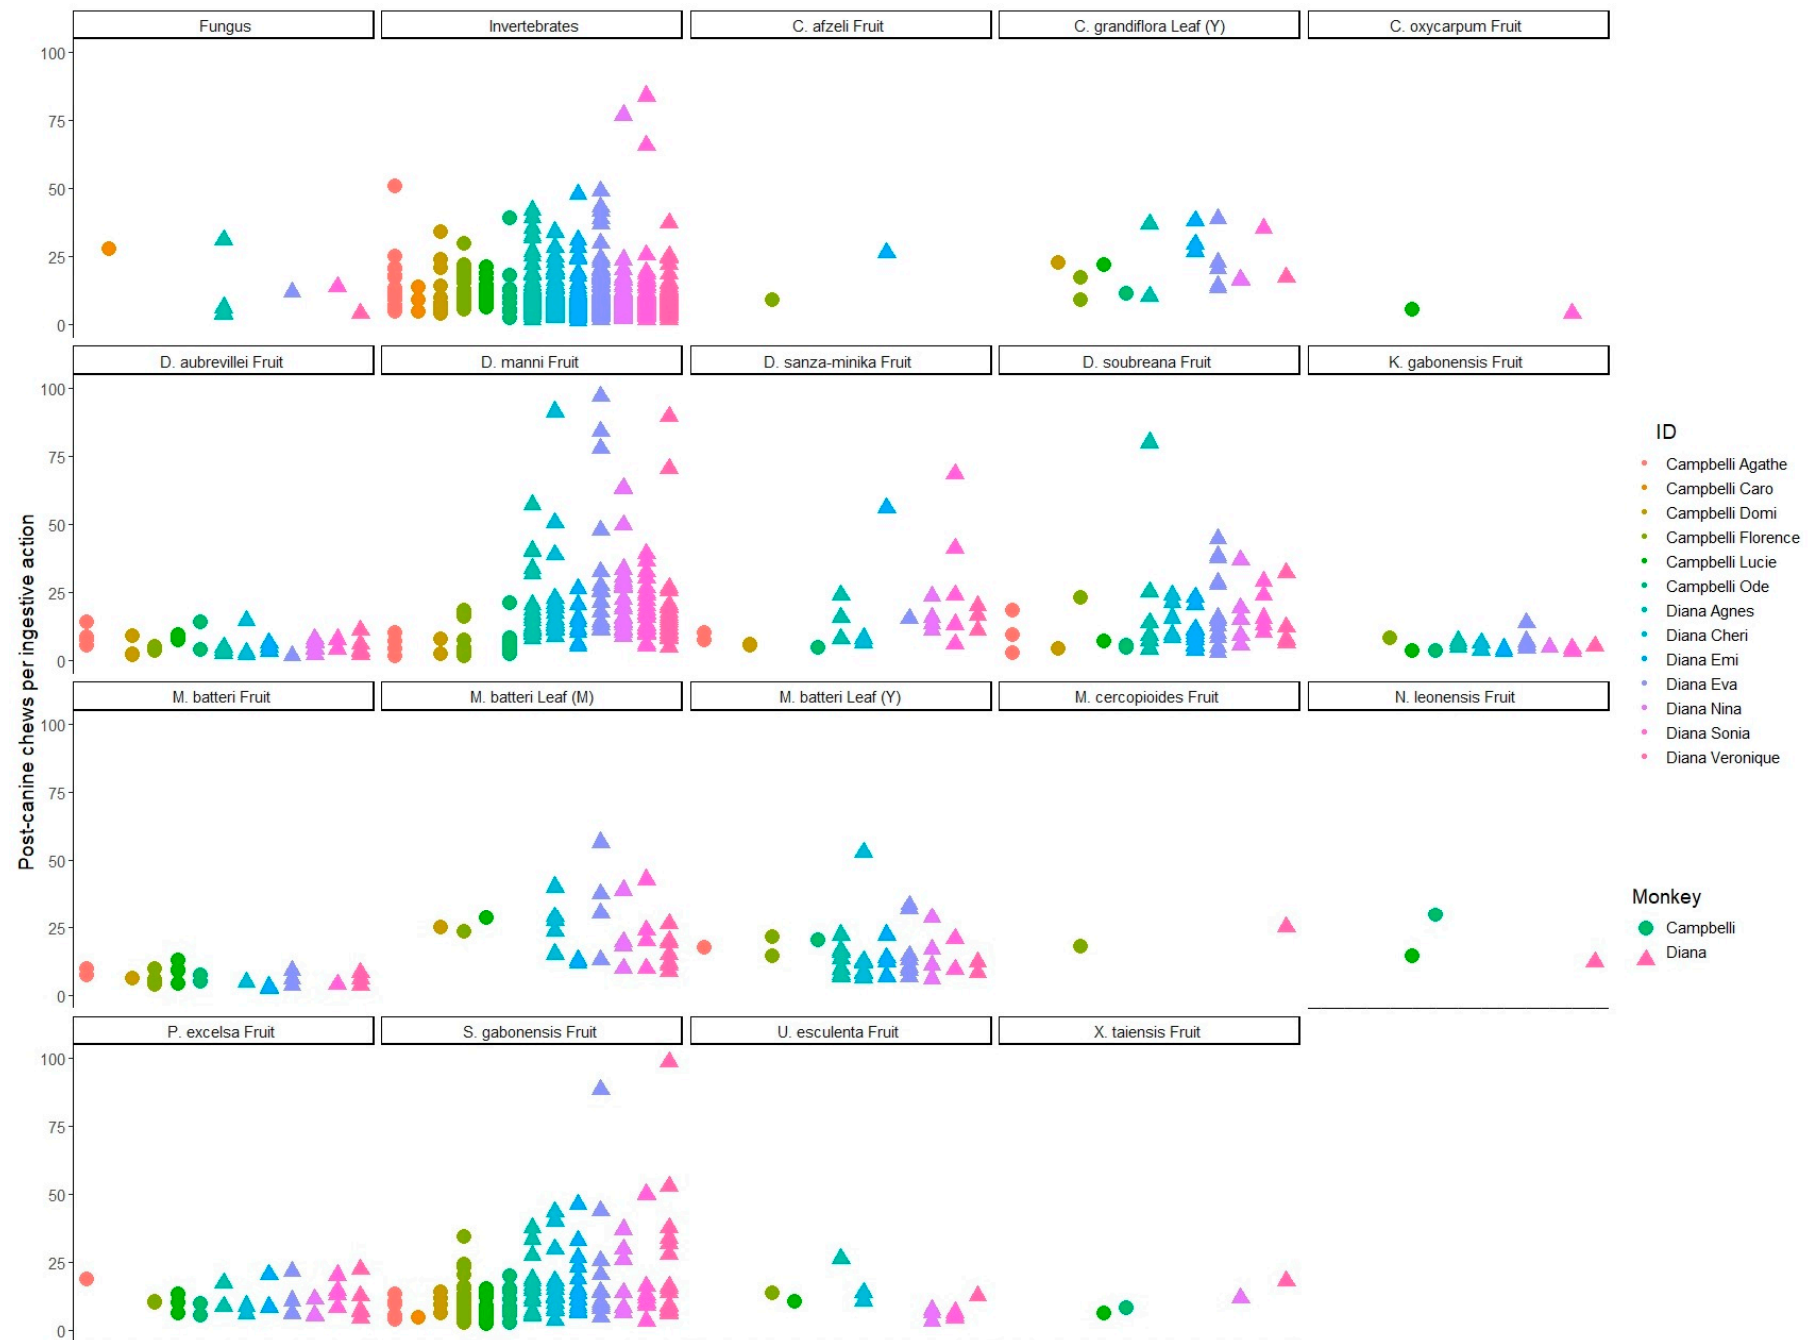

Supplemental Figure S2. Post-canine chews per ingestive action during focal follows of individually identified Campbell's and Diana monkeys feeding on shared food items.
